# Supplementary material for: Hsa_circ_0006692 Promotes Lung Cancer Progression via miR-205-5p/CDK19 Axis
Source: MDPI journal article supplement (doi:10.3390/genes13050846), 2022-05-10
Supplement: s1 [file s1]

Supplementary Table1. The list and sequence of long primers used for RT-qPCR analysis

| Gene         | Sequence (5'-3')         | Length(bases) |
|--------------|--------------------------|---------------|
| circ-0006692 |                          |               |
| F-primer     | CGGATGCGTGTGAGAAAGT      | 20            |
| R-primer     | CTCGCTGTCACAGTTGGGTA     | 20            |
| CDK19        |                          |               |
| F-primer     | ATGCAGAGCATGACTTGTG<br>G | 20            |
| R-primer     | GACTCTCCCCCTCTCAGGA<br>C | 20            |
| MMP7         |                          |               |
| F-primer     | TGGGGAAGTCTGACATCAT      | 20            |
| R-primer     | CCCTAGACTGCTACCATCCG     | 20            |
| CDH1         |                          |               |
| F-primer     | CGGACGATGATGTGAACAC<br>C | 20            |
| R-primer     | TTGCTGTTGTGCTTAACCCC     | 20            |
| CDH2         |                          |               |
| F-primer     | CGGTTTCATTTGAGGGCACA     | 20            |
| R-primer     | TTGGAGCCTGAGACACGATT     | 20            |
| VIM          |                          |               |
| F-primer     | GAGTCCACTGAGTACCGGA<br>G | 20            |
| R-primer     | ACGAGCCATTTCTCCTTCA      | 20            |
| PCNA         |                          |               |
| F-primer     | GGCGTGAACCTCACCAGTA<br>T | 20            |
| R-primer     | TCTCGGCATATACGTGCAAA     | 20            |
| CCND1        |                          |               |
| F-primer     | CTGCGAAGTGGAAACCATC      | 20            |
| R-primer     | CACATCTCCAGCATCCAGGT     | 20            |
| BCL2         |                          |               |
| F-primer     | GCCTTCTTTGAGTTCGGTGG     | 20            |
| R-primer     | GAAATCAAACAGAGGCCGC<br>A | 20            |
